# Supplementary material for: Identification of a neural basis for cold acclimation in Drosophila larvae
Source: PubMed Central journal article supplement — iScience. 2021 May 28;24(6):102657. doi: 10.1016/j.isci.2021.102657 (PMC8192725; doi:10.1016/j.isci.2021.102657), 2021-05-28
Supplement: mmc1.pdf [file mmc1.pdf]

iScience, Volume 24

## Supplemental information

### Identification of a neural basis for cold acclimation

#### in *Drosophila* larvae

Nathaniel J. Himmel, Jamin M. Letcher, Akira Sakurai, Thomas R. Gray, Maggie N. Benson, Kevin J. Donaldson, and Daniel N. Cox

# Supplementary material from “Identification of a neural basis for cold acclimation in *Drosophila* larvae”

**Nathaniel J. Himmel<sup>1,2</sup>, Jamin M. Letcher<sup>1,3</sup>, Akira Sakurai<sup>1,4</sup>, Thomas R. Gray<sup>1,5</sup>, Maggie N. Benson<sup>1</sup>, Kevin J. Donaldson<sup>1,6</sup>, and Daniel N. Cox<sup>1,7</sup>**

*1 – Neuroscience Institute, Georgia State University, Atlanta, GA, USA*

*2 – ORCID: 0000-0001-7876-6960*

*3 – ORCID: 0000-0003-3077-0615*

*4 – ORCID: 0000-0003-2858-1620*

*5 – ORCID: 0000-0002-6176-005X*

*6 – ORCID: 0000-0002-9144-3776*

*7 – ORCID: 0000-0001-9191-9212*

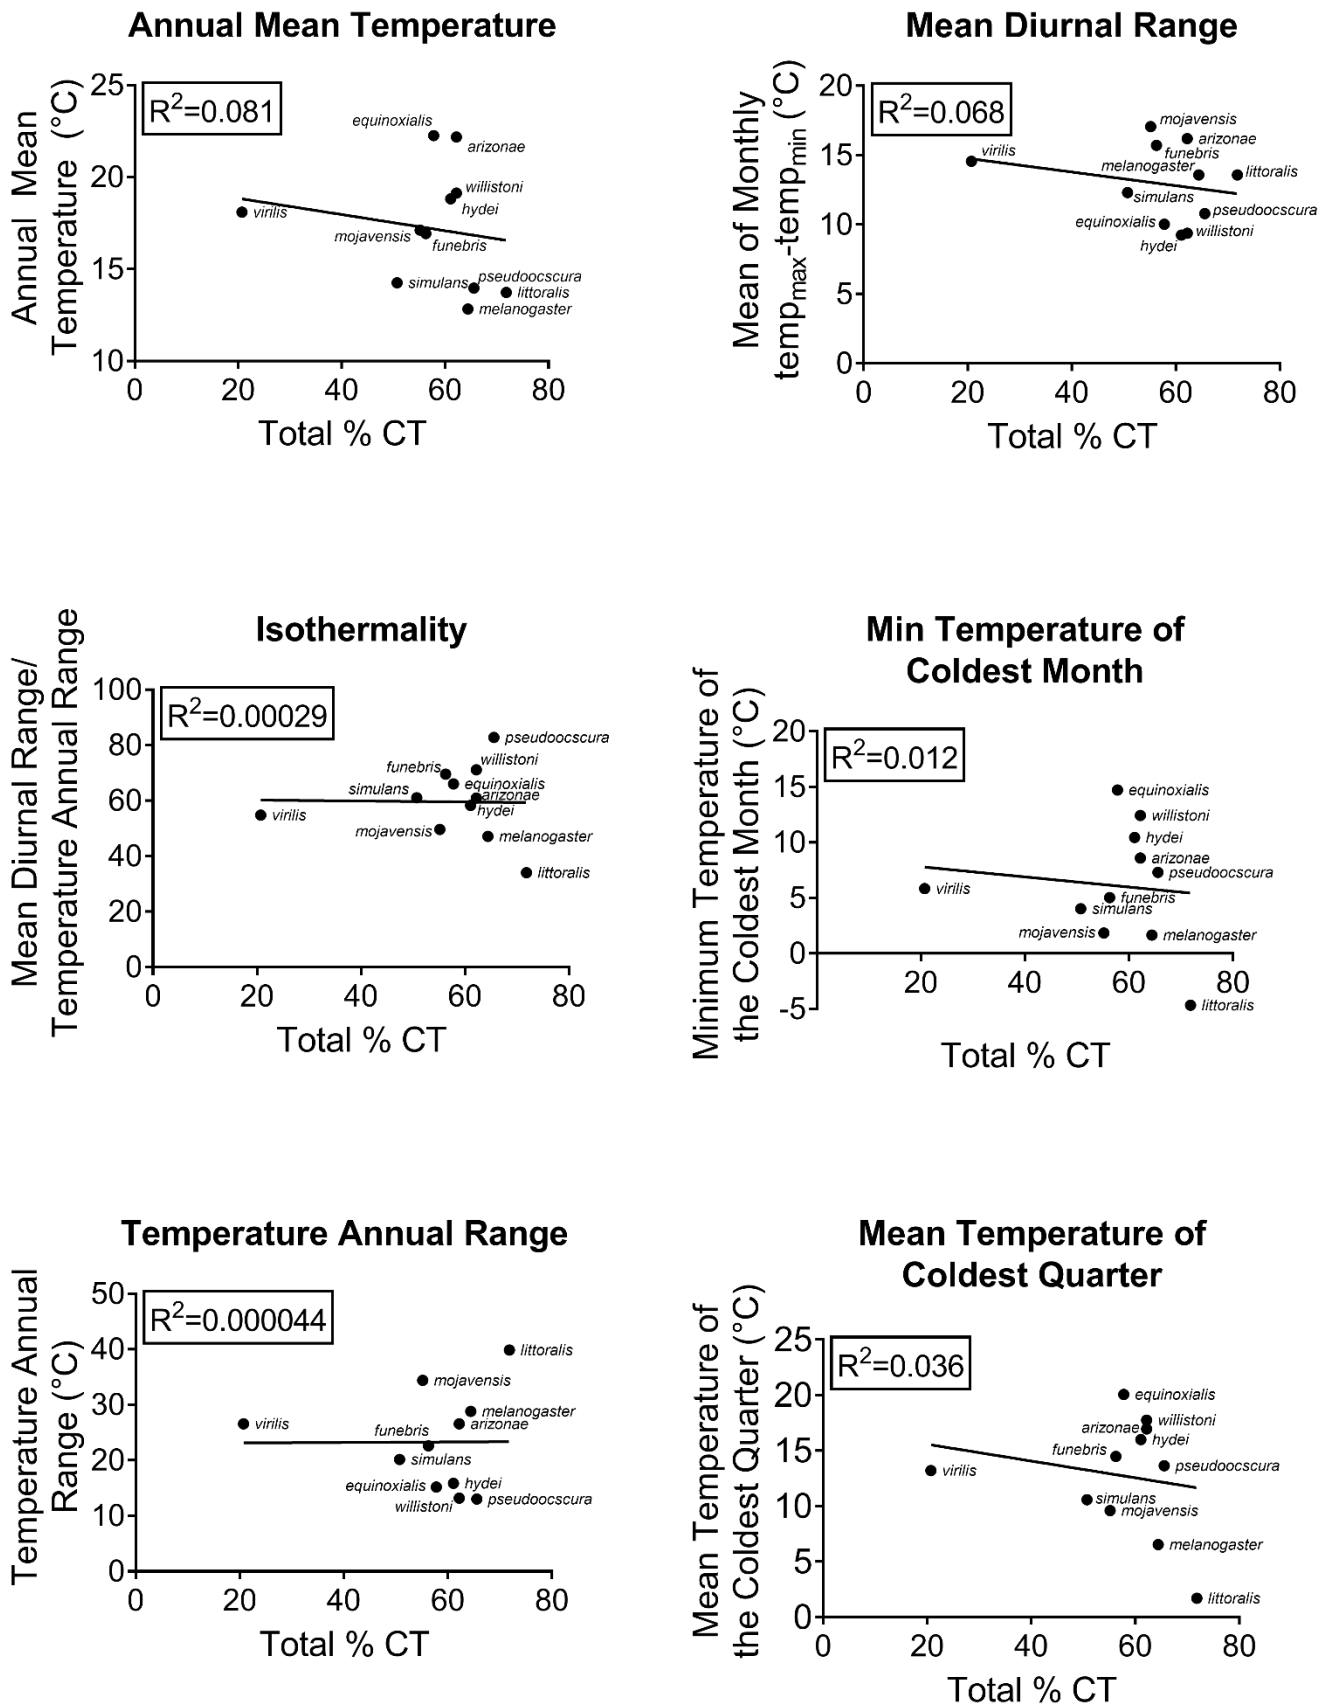

**Figure S1.** Correlations between environmental variables and Total % CT across temperatures, related to Figure 3.

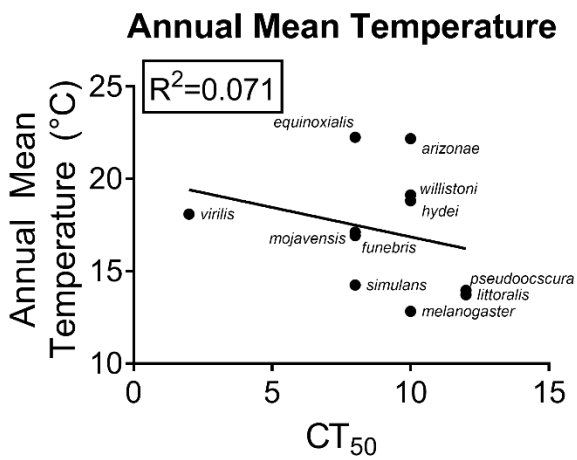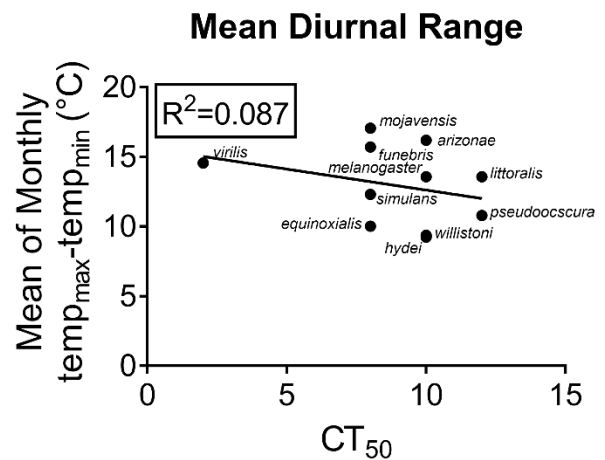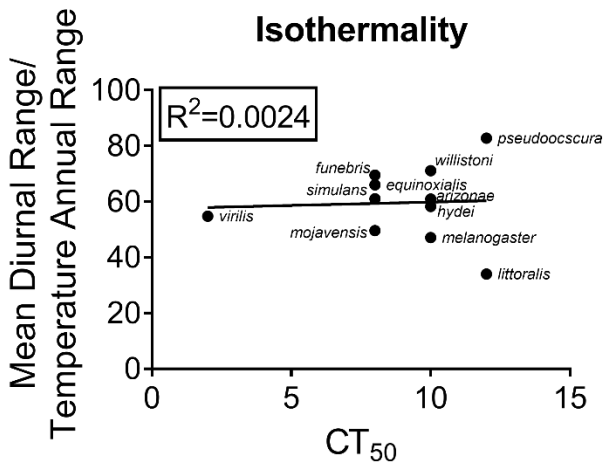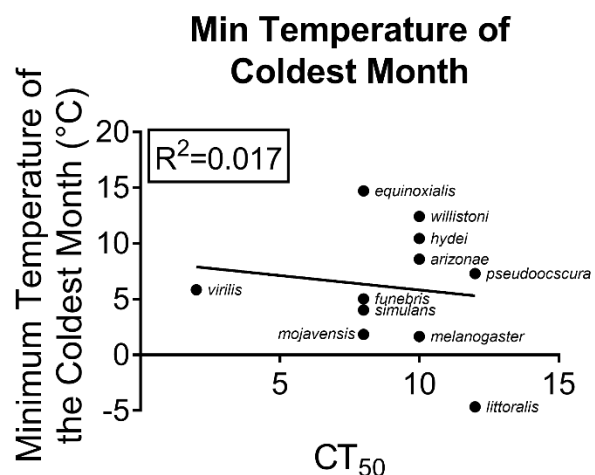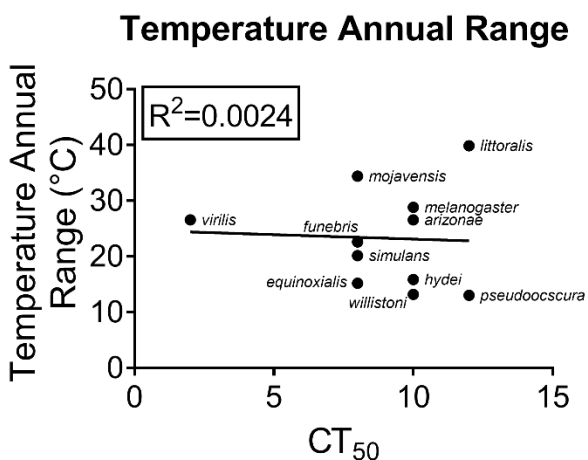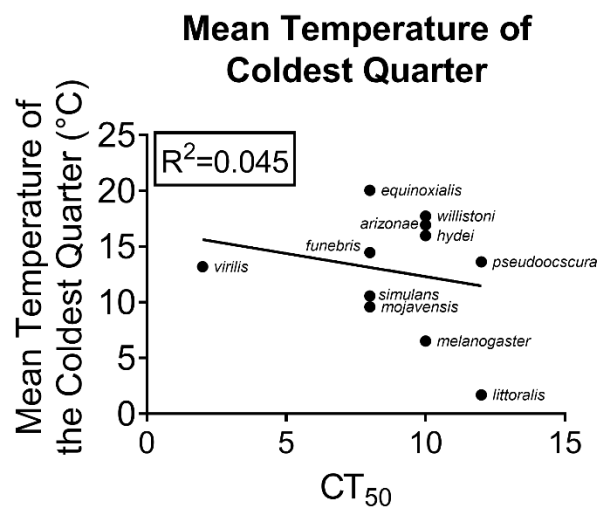

**Figure S2.** Correlations between environmental variables and temperature of  $\geq 50\%$  subject CT (CT<sub>50</sub>), related to Figure 3.

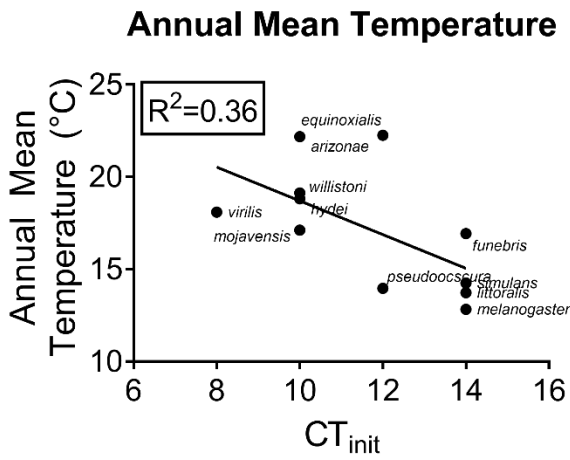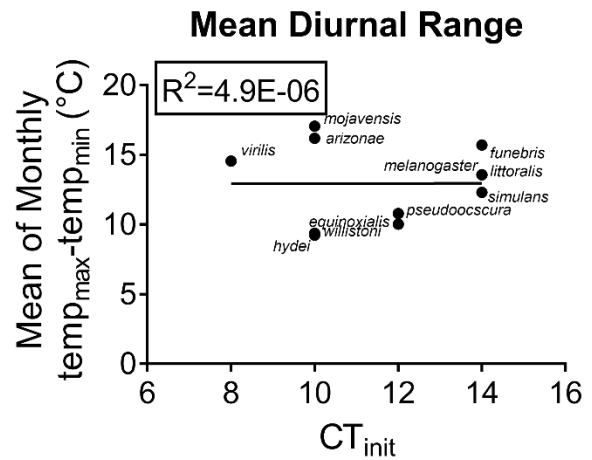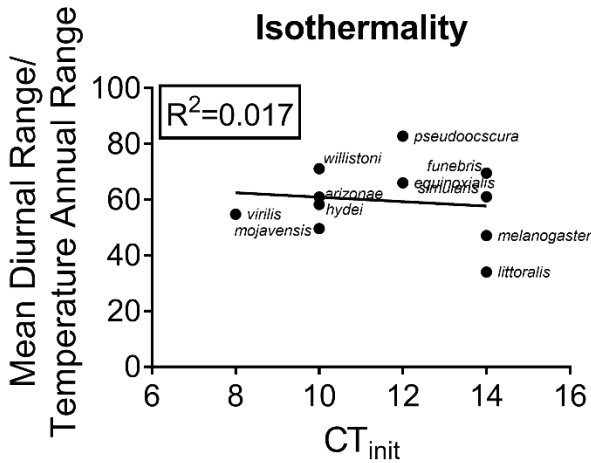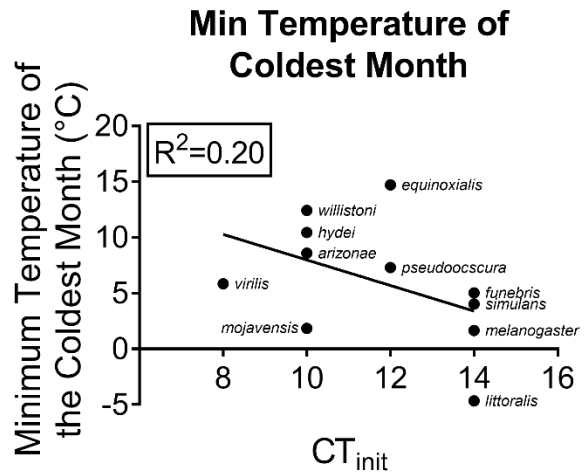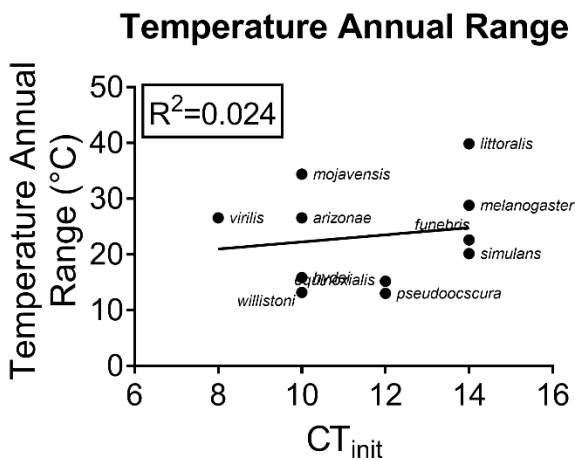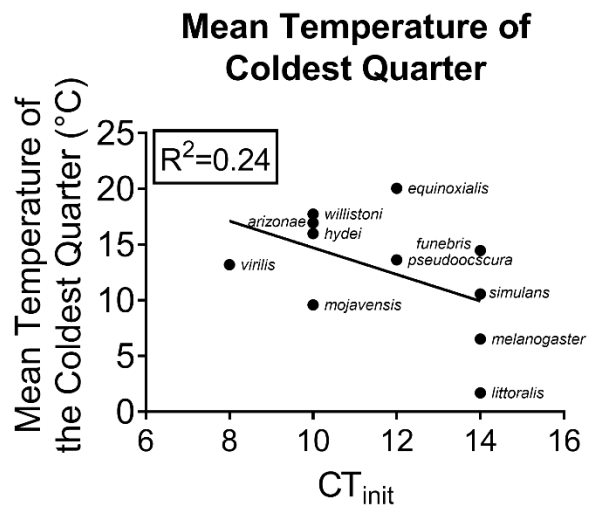

**Figure S3.** Correlations between environmental variables and highest temperature of CT onset, related to Figure 3.

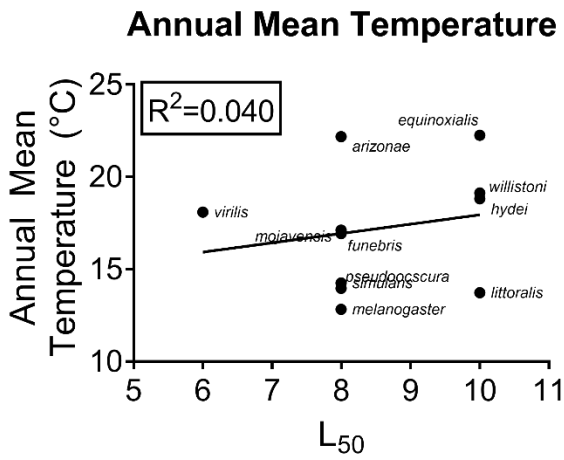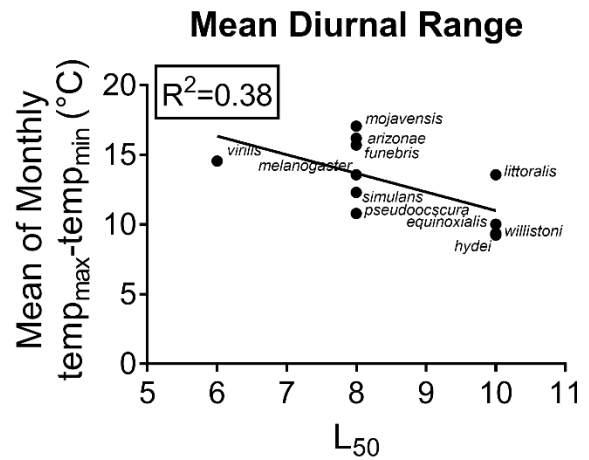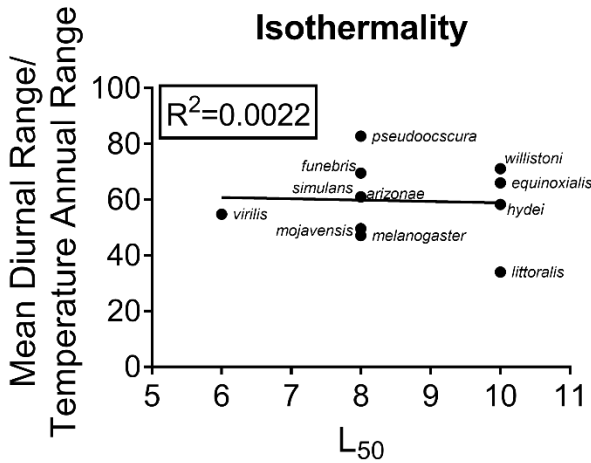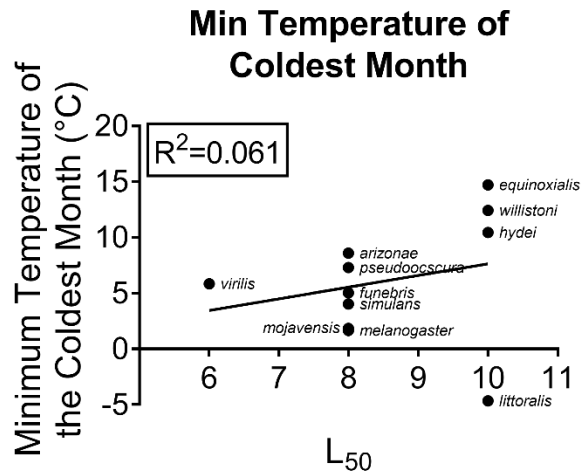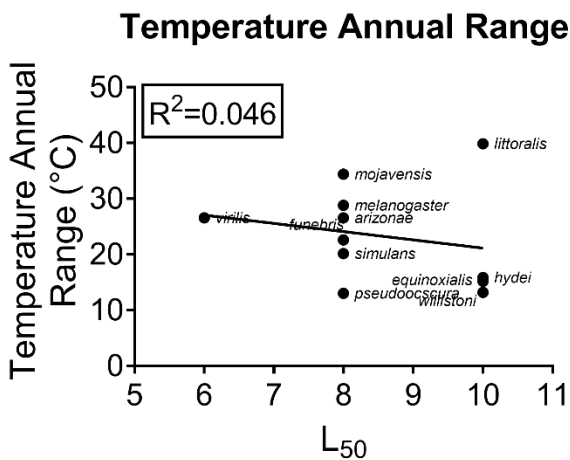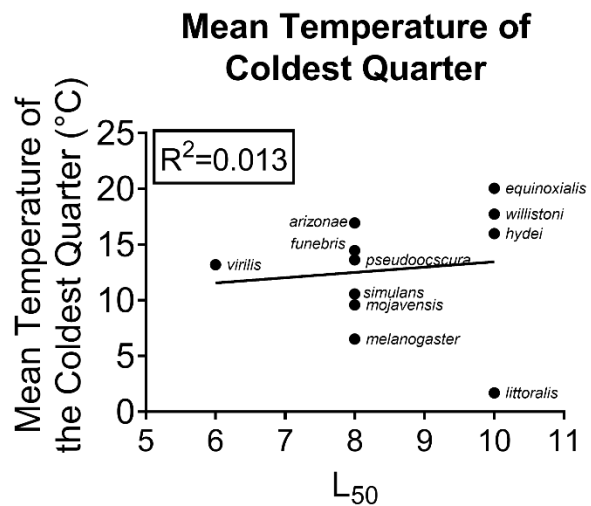

**Figure S4.** Correlations between environmental variables and temperature of  $\leq 50\%$  subject locomotion ( $L_{50}$ ), related to Figure 3

## Binned CIII Cold-Evoked Activity

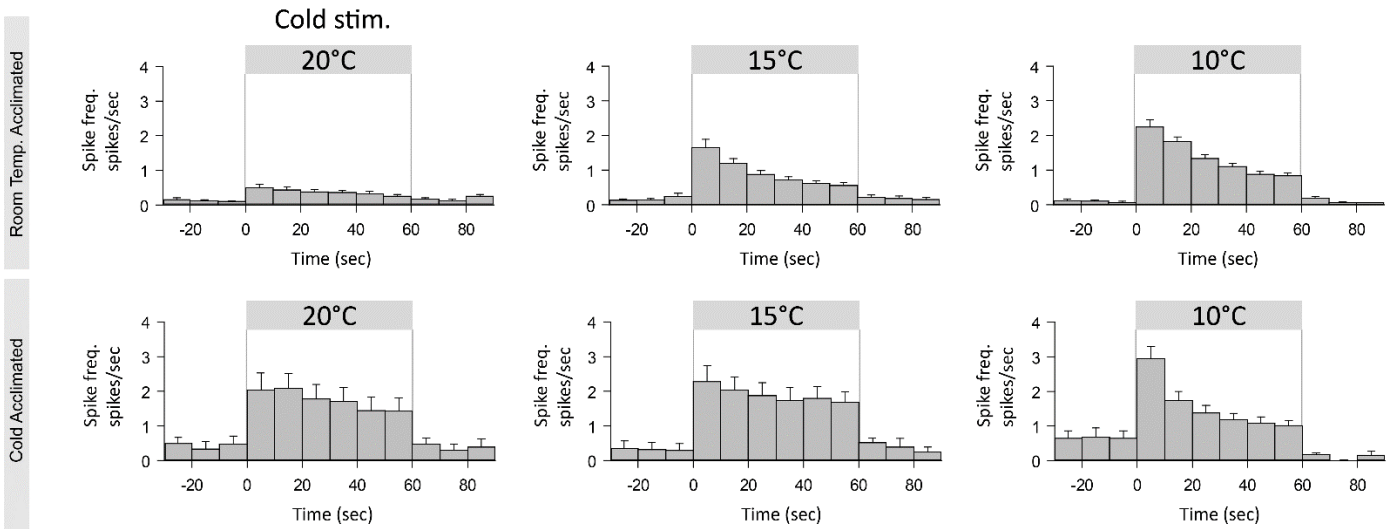

**Figure S5.** CIII neural activity by 10 second bins, related to Figure 5.





| Species                         | Accession Number |              |              |
|---------------------------------|------------------|--------------|--------------|
|                                 | Col              | Col          | Adh          |
| <i>Drosophila melanogaster</i>  | FBpp0100176      | FBpp0100177  | FBpp0100047  |
| <i>Drosophila simulans</i>      | NP_982323        | P50253       | XP_016024999 |
| <i>Drosophila pseudoobscura</i> | YP_009742607     | KAF3759836   | XP_001357375 |
| <i>Drosophila willistoni</i>    | DAA06222         | AAR05888     | XP_015033661 |
| <i>Drosophila equinoxialis</i>  | AUW36081         | AAL83280     | Q9NG42       |
| <i>Drosophila virilis</i>       | ADW41404         | ABD84161     | XP_002057583 |
| <i>Drosophila littoralis</i>    | YP_002327403     | YP_002327404 | ABG56059     |
| <i>Drosophila hydei</i>         | AFV25509         | AAD37708     | P23236       |
| <i>Drosophila funebris</i>      | AHL43561         | AAM70094     | CAA73700     |
| <i>Drosophila mojavensis</i>    | DAA06235         | ABD93167     | XP_002002930 |
| <i>Drosophila arizonae</i>      | ABD38168         | ABD93155     | XP_017859111 |

**Table S1.** Accession numbers for sequences used to generate *Drosophila* phylogeny, related to Figure 1. Sequences from *Drosophila melanogaster* from FlyBase; all others from GenBank.

*melanogaster*

| Temp | Loco | P   | CT   | SER | HR | TR | HTR | HW  | twitch | roll |
|------|------|-----|------|-----|----|----|-----|-----|--------|------|
| 0    | 0%   | 0%  | 100% | 0%  | 0% | 0% | 0%  | 0%  | 0%     | 0%   |
| 2    | 0%   | 0%  | 100% | 0%  | 0% | 0% | 0%  | 0%  | 0%     | 0%   |
| 4    | 0%   | 0%  | 100% | 0%  | 0% | 0% | 0%  | 0%  | 0%     | 0%   |
| 6    | 3%   | 0%  | 100% | 0%  | 0% | 0% | 0%  | 0%  | 0%     | 0%   |
| 8    | 10%  | 0%  | 87%  | 0%  | 0% | 0% | 0%  | 3%  | 0%     | 0%   |
| 10   | 87%  | 7%  | 77%  | 0%  | 0% | 7% | 7%  | 13% | 0%     | 0%   |
| 12   | 100% | 83% | 17%  | 0%  | 0% | 0% | 0%  | 0%  | 0%     | 0%   |
| 14   | 87%  | 0%  | 0%   | 0%  | 0% | 0% | 0%  | 0%  | 0%     | 0%   |
| 16   | 100% | 0%  | 0%   | 0%  | 0% | 0% | 0%  | 0%  | 0%     | 0%   |

**Table S2.** *Drosophila melanogaster* cold-evoked behavioral program, related to Figure 1. Each value shows the % of larvae performing a particular behavior, at a particular temperature.

*simulans*

| Temp | Loco | P   | CT  | SER | HR | TR  | HTR | HW  | twitch | roll |
|------|------|-----|-----|-----|----|-----|-----|-----|--------|------|
| 0    | 0%   | 3%  | 97% | 0%  | 0% | 0%  | 0%  | 0%  | 0%     | 0%   |
| 2    | 0%   | 0%  | 90% | 0%  | 0% | 0%  | 0%  | 10% | 0%     | 0%   |
| 4    | 0%   | 7%  | 90% | 0%  | 0% | 0%  | 0%  | 3%  | 0%     | 0%   |
| 6    | 0%   | 0%  | 90% | 0%  | 3% | 17% | 10% | 0%  | 0%     | 0%   |
| 8    | 17%  | 0%  | 70% | 0%  | 0% | 13% | 10% | 0%  | 3%     | 0%   |
| 10   | 59%  | 45% | 14% | 0%  | 3% | 3%  | 3%  | 14% | 3%     | 0%   |
| 12   | 63%  | 87% | 3%  | 0%  | 0% | 7%  | 3%  | 3%  | 0%     | 0%   |
| 14   | 90%  | 83% | 3%  | 0%  | 0% | 0%  | 0%  | 0%  | 0%     | 0%   |
| 16   | 100% | 0%  | 0%  | 0%  | 0% | 0%  | 0%  | 0%  | 0%     | 0%   |

**Table S3.** *Drosophila simulans* cold-evoked behavioral program, related to Figure 1. Each value shows the % of larvae performing a particular behavior, at a particular temperature.

*virilis*

| Temp | Loco | P   | CT  | SER | HR | TR | HTR | HW | twitch | roll |
|------|------|-----|-----|-----|----|----|-----|----|--------|------|
| 0    | 0%   | 0%  | 57% | 0%  | 3% | 0% | 0%  | 0% | 0%     | 7%   |
| 2    | 0%   | 0%  | 63% | 0%  | 0% | 0% | 0%  | 0% | 0%     | 0%   |
| 4    | 0%   | 0%  | 47% | 0%  | 0% | 0% | 0%  | 0% | 0%     | 0%   |
| 6    | 0%   | 0%  | 17% | 0%  | 0% | 3% | 3%  | 0% | 0%     | 0%   |
| 8    | 7%   | 7%  | 3%  | 0%  | 7% | 0% | 0%  | 0% | 0%     | 0%   |
| 10   | 70%  | 67% | 0%  | 0%  | 0% | 3% | 3%  | 0% | 0%     | 0%   |
| 12   | 73%  | 67% | 0%  | 0%  | 0% | 0% | 0%  | 0% | 0%     | 0%   |
| 14   | 100% | 20% | 0%  | 0%  | 0% | 0% | 0%  | 0% | 0%     | 0%   |
| 16   | 100% | 0%  | 0%  | 0%  | 0% | 0% | 0%  | 0% | 0%     | 0%   |

**Table S4.** *Drosophila virilis* cold-evoked behavioral program, related to Figure 1. Each value shows the % of larvae performing a particular behavior, at a particular temperature.

*pseudoobscura*

| Temp | Loco | P   | CT   | SER | HR  | TR | HTR | HW | twitch | roll |
|------|------|-----|------|-----|-----|----|-----|----|--------|------|
| 0    | 0%   | 0%  | 100% | 0%  | 7%  | 0% | 0%  | 0% | 0%     | 0%   |
| 2    | 0%   | 0%  | 100% | 0%  | 10% | 0% | 0%  | 0% | 0%     | 0%   |
| 4    | 0%   | 0%  | 100% | 0%  | 20% | 0% | 0%  | 0% | 0%     | 0%   |
| 6    | 0%   | 0%  | 97%  | 0%  | 0%  | 0% | 0%  | 0% | 0%     | 0%   |
| 8    | 50%  | 0%  | 97%  | 0%  | 3%  | 0% | 0%  | 0% | 0%     | 0%   |
| 10   | 77%  | 7%  | 90%  | 0%  | 0%  | 0% | 0%  | 0% | 0%     | 0%   |
| 12   | 93%  | 77% | 7%   | 0%  | 0%  | 0% | 0%  | 0% | 0%     | 0%   |
| 14   | 87%  | 27% | 0%   | 0%  | 0%  | 0% | 0%  | 0% | 0%     | 0%   |
| 16   | 100% | 0%  | 0%   | 0%  | 0%  | 0% | 0%  | 0% | 0%     | 0%   |

**Table S5.** *Drosophila pseudoobscura* cold-evoked behavioral program, related to Figure 1. Each value shows the % of larvae performing a particular behavior, at a particular temperature.

*willistoni*

| Temp | Loco | P    | CT   | SER | HR | TR | HTR | HW | twitch | roll |
|------|------|------|------|-----|----|----|-----|----|--------|------|
| 0    | 0%   | 0%   | 97%  | 0%  | 0% | 3% | 0%  | 0% | 0%     | 0%   |
| 2    | 0%   | 0%   | 90%  | 0%  | 0% | 0% | 0%  | 0% | 0%     | 3%   |
| 4    | 0%   | 0%   | 90%  | 0%  | 0% | 7% | 0%  | 0% | 0%     | 0%   |
| 6    | 0%   | 0%   | 93%  | 0%  | 0% | 3% | 0%  | 0% | 0%     | 0%   |
| 8    | 0%   | 0%   | 100% | 0%  | 0% | 0% | 0%  | 0% | 0%     | 0%   |
| 10   | 0%   | 0%   | 90%  | 0%  | 3% | 0% | 0%  | 0% | 0%     | 0%   |
| 12   | 87%  | 87%  | 0%   | 0%  | 0% | 0% | 0%  | 0% | 0%     | 0%   |
| 14   | 100% | 100% | 0%   | 0%  | 0% | 0% | 0%  | 0% | 0%     | 0%   |
| 16   | 100% | 50%  | 0%   | 0%  | 0% | 0% | 0%  | 0% | 0%     | 0%   |

**Table S6.** *Drosophila willistoni* cold-evoked behavioral program, related to Figure 1. Each value shows the % of larvae performing a particular behavior, at a particular temperature.

*equinoxialis*

| Temp | Loco | P   | CT   | SER | HR  | TR  | HTR | HW  | twitch | roll |
|------|------|-----|------|-----|-----|-----|-----|-----|--------|------|
| 0    | 0%   | 0%  | 100% | 0%  | 0%  | 10% | 3%  | 0%  | 0%     | 0%   |
| 2    | 0%   | 0%  | 100% | 0%  | 0%  | 17% | 13% | 0%  | 0%     | 0%   |
| 4    | 0%   | 0%  | 100% | 0%  | 0%  | 0%  | 0%  | 0%  | 0%     | 0%   |
| 6    | 0%   | 0%  | 73%  | 0%  | 7%  | 3%  | 0%  | 7%  | 3%     | 3%   |
| 8    | 0%   | 0%  | 80%  | 0%  | 10% | 3%  | 3%  | 10% | 3%     | 3%   |
| 10   | 10%  | 14% | 48%  | 0%  | 0%  | 7%  | 3%  | 31% | 0%     | 0%   |
| 12   | 87%  | 40% | 20%  | 0%  | 0%  | 3%  | 3%  | 27% | 0%     | 7%   |
| 14   | 100% | 67% | 0%   | 0%  | 0%  | 0%  | 0%  | 0%  | 7%     | 0%   |
| 16   | 100% | 80% | 0%   | 0%  | 0%  | 0%  | 0%  | 0%  | 0%     | 0%   |

**Table S7.** *Drosophila equinoxialis* cold-evoked behavioral program, related to Figure 1. Each value shows the % of larvae performing a particular behavior, at a particular temperature.

*funnebris*

| Temp | Loco | P   | CT   | SER | HR | TR | HTR | HW  | twitch | roll |
|------|------|-----|------|-----|----|----|-----|-----|--------|------|
| 0    | 0%   | 0%  | 100% | 0%  | 0% | 0% | 0%  | 0%  | 0%     | 0%   |
| 2    | 0%   | 0%  | 100% | 0%  | 7% | 0% | 0%  | 0%  | 0%     | 0%   |
| 4    | 0%   | 0%  | 83%  | 0%  | 3% | 0% | 0%  | 10% | 0%     | 0%   |
| 6    | 13%  | 0%  | 97%  | 0%  | 0% | 0% | 0%  | 3%  | 0%     | 0%   |
| 8    | 13%  | 0%  | 97%  | 0%  | 0% | 0% | 0%  | 0%  | 0%     | 0%   |
| 10   | 90%  | 14% | 17%  | 0%  | 0% | 0% | 0%  | 24% | 0%     | 0%   |
| 12   | 100% | 0%  | 10%  | 0%  | 3% | 0% | 0%  | 20% | 0%     | 0%   |
| 14   | 100% | 3%  | 3%   | 0%  | 0% | 0% | 0%  | 0%  | 0%     | 0%   |
| 16   | 100% | 0%  | 0%   | 0%  | 0% | 0% | 0%  | 0%  | 0%     | 0%   |

**Table S8.** *Drosophila funnebris* cold-evoked behavioral program, related to Figure 1. Each value shows the % of larvae performing a particular behavior, at a particular temperature.



*arizonae*

| Temp | Loco | P   | CT   | SER | HR  | TR  | HTR | HW  | twitch | roll |
|------|------|-----|------|-----|-----|-----|-----|-----|--------|------|
| 0    | 0%   | 0%  | 100% | 0%  | 0%  | 10% | 3%  | 0%  | 0%     | 0%   |
| 2    | 0%   | 0%  | 100% | 10% | 0%  | 3%  | 3%  | 0%  | 0%     | 0%   |
| 4    | 0%   | 0%  | 100% | 23% | 0%  | 20% | 13% | 0%  | 0%     | 0%   |
| 6    | 0%   | 0%  | 100% | 87% | 10% | 30% | 0%  | 0%  | 3%     | 0%   |
| 8    | 27%  | 0%  | 93%  | 10% | 3%  | 3%  | 0%  | 3%  | 0%     | 7%   |
| 10   | 53%  | 30% | 67%  | 0%  | 0%  | 0%  | 0%  | 3%  | 0%     | 0%   |
| 12   | 60%  | 90% | 0%   | 0%  | 0%  | 0%  | 0%  | 10% | 0%     | 0%   |
| 14   | 93%  | 33% | 0%   | 0%  | 0%  | 0%  | 0%  | 17% | 0%     | 0%   |
| 16   | 100% | 3%  | 0%   | 0%  | 0%  | 0%  | 0%  | 0%  | 0%     | 0%   |

**Table S9.** *Drosophila arizonae* cold-evoked behavioral program, related to Figure 1. Each value shows the % of larvae performing a particular behavior, at a particular temperature.

*littoralis*

| Temp | Loco | P   | CT   | SER | HR  | TR  | HTR | HW | twitch | roll |
|------|------|-----|------|-----|-----|-----|-----|----|--------|------|
| 0    | 0%   | 3%  | 100% | 0%  | 10% | 0%  | 0%  | 0% | 0%     | 0%   |
| 2    | 0%   | 17% | 100% | 0%  | 10% | 3%  | 0%  | 0% | 0%     | 0%   |
| 4    | 0%   | 0%  | 100% | 0%  | 10% | 0%  | 0%  | 0% | 0%     | 0%   |
| 6    | 13%  | 0%  | 100% | 0%  | 3%  | 10% | 0%  | 0% | 0%     | 0%   |
| 8    | 20%  | 3%  | 93%  | 0%  | 0%  | 0%  | 0%  | 0% | 0%     | 0%   |
| 10   | 37%  | 7%  | 90%  | 0%  | 3%  | 3%  | 0%  | 0% | 0%     | 0%   |
| 12   | 63%  | 30% | 50%  | 0%  | 0%  | 0%  | 0%  | 0% | 0%     | 0%   |
| 14   | 87%  | 57% | 13%  | 0%  | 0%  | 3%  | 0%  | 0% | 0%     | 0%   |
| 16   | 100% | 20% | 0%   | 0%  | 3%  | 0%  | 0%  | 0% | 0%     | 0%   |

**Table S10.** *Drosophila littoralis* cold-evoked behavioral program, related to Figure 1. Each value shows the % of larvae performing a particular behavior, at a particular temperature.

*mojavensis*

| Temp | Loco | P   | CT   | SER | HR  | TR  | HTR | HW  | twitch | roll |
|------|------|-----|------|-----|-----|-----|-----|-----|--------|------|
| 0    | 0%   | 0%  | 100% | 30% | 3%  | 27% | 10% | 0%  | 0%     | 0%   |
| 2    | 0%   | 0%  | 93%  | 17% | 0%  | 23% | 7%  | 0%  | 0%     | 0%   |
| 4    | 0%   | 0%  | 97%  | 3%  | 0%  | 20% | 0%  | 0%  | 0%     | 0%   |
| 6    | 3%   | 3%  | 97%  | 40% | 3%  | 67% | 0%  | 0%  | 0%     | 0%   |
| 8    | 37%  | 3%  | 80%  | 13% | 0%  | 0%  | 0%  | 10% | 0%     | 0%   |
| 10   | 70%  | 13% | 30%  | 3%  | 10% | 0%  | 0%  | 40% | 0%     | 3%   |
| 12   | 93%  | 0%  | 0%   | 0%  | 3%  | 0%  | 0%  | 0%  | 0%     | 0%   |
| 14   | 100% | 0%  | 0%   | 0%  | 3%  | 0%  | 0%  | 0%  | 0%     | 3%   |
| 16   | 100% | 0%  | 0%   | 0%  | 0%  | 0%  | 0%  | 0%  | 0%     | 0%   |

**Table S11.** *Drosophila mojavensis* cold-evoked behavioral program, related to Figure 1. Each value shows the % of larvae performing a particular behavior, at a particular temperature.

*hydei*

| Temp | Loco | P   | CT   | SER | HR | TR  | HTR | HW  | twitch | roll |
|------|------|-----|------|-----|----|-----|-----|-----|--------|------|
| 0    | 0%   | 0%  | 100% | 70% | 0% | 0%  | 0%  | 0%  | 0%     | 0%   |
| 2    | 0%   | 0%  | 100% | 33% | 0% | 0%  | 0%  | 0%  | 0%     | 0%   |
| 4    | 0%   | 0%  | 100% | 43% | 0% | 0%  | 0%  | 0%  | 0%     | 0%   |
| 6    | 0%   | 0%  | 100% | 30% | 0% | 17% | 0%  | 0%  | 0%     | 0%   |
| 8    | 3%   | 0%  | 97%  | 0%  | 0% | 0%  | 0%  | 3%  | 0%     | 0%   |
| 10   | 37%  | 7%  | 53%  | 30% | 0% | 0%  | 0%  | 20% | 0%     | 0%   |
| 12   | 77%  | 87% | 0%   | 3%  | 0% | 0%  | 0%  | 10% | 0%     | 0%   |
| 14   | 93%  | 10% | 0%   | 0%  | 0% | 0%  | 0%  | 0%  | 0%     | 0%   |
| 16   | 100% | 0%  | 0%   | 0%  | 0% | 0%  | 0%  | 0%  | 0%     | 0%   |

**Table S12.** *Drosophila hydei* cold-evoked behavioral program, related to Figure 1. Each value shows the % of larvae performing a particular behavior, at a particular temperature.
